# Supplementary material for: Retrospective Investigation of the Whole Genome of the Hypovirulent Listeria monocytogenes Strain of ST201, CC69, Lineage III, Isolated from a Piglet with Fatal Neurolisteriosis
Source: MDPI journal article supplement (doi:10.3390/microorganisms10071442), 2022-07-17
Supplement: s1 [file s1]

**Table S1.** Brief characteristics of the *L. monocytogenes* strain 4/52-1953 after the automatic contig annotation that was generated based on the NCBI Prokaryotic Genome Annotation Pipeline (PGAP).

| Totally | CDSs  | Coding proteins | Number of Genes        |       |                         | Total | Ambiguous residues | Number of Pseudo Genes |            |                    | Multiple problems | GC, % |
|---------|-------|-----------------|------------------------|-------|-------------------------|-------|--------------------|------------------------|------------|--------------------|-------------------|-------|
|         |       |                 | tRNAs/complete tRNAs   | ncRNA | CDSs (without proteins) |       |                    | With frameshift        | Incomplete | With internal stop |                   |       |
| 3.027   | 2.950 | 2.925           | 5, 5, 5 (5S, 16S, 23S) | 4     | 25                      | 25    | 0 of 25            | 11 of 25               | 14 of 25   | 3 of 25            | 3 of 25           | 38.17 |

**Table S2.** The number of SNPs in the *L. monocytogenes* housekeeping genes of ST 201 versus ST157.

| <i>abcZ</i> | <i>bglA</i> | <i>cat</i> | <i>dapE</i> | <i>dat</i> | <i>ldh</i> | <i>lhkA</i> |
|-------------|-------------|------------|-------------|------------|------------|-------------|
| 10          | 7           | 5          | 2           | 3          | 3          | 70          |

<sup>1</sup> BIGSdb-Lm provides access to genotypic data for *L. monocytogenes* isolates based on multi-locus sequence typing (MLST) (<https://bigsdb.pasteur.fr/listeria/>, accessed on 01 June 2022).

**Table S3.** Antibiotic resistance genes identified using the CARD RGI tool in the whole genome sequence of *L. monocytogenes* strain 4/52-1953.

| RGI Criteria | ARO Term                     | Detection Criteria    | AMR Gene Family                          | Drug Class          | Resistance Mechanism         | % Identity of Matching Region | % Length of Reference Sequence |
|--------------|------------------------------|-----------------------|------------------------------------------|---------------------|------------------------------|-------------------------------|--------------------------------|
| Strict       | <i>lin</i>                   | protein homolog model | lincosamide nucleotidyltransferase (LNU) | lincosamides        | antibiotic inactivation      | 98.28                         | 100.00                         |
| Strict       | <i>L. monocytogenes mprF</i> | protein homolog model | defensin resistant mprF                  | peptide antibiotics | antibiotic target alteration | 98.73                         | 100.00                         |
| Strict       | <i>fosX</i>                  | protein homolog model | fosfomycin thiol transferase             | fosfomycins         | antibiotic inactivation      | 93.98                         | 100.00                         |
